# Supplementary material for: Effects of application of biochar and straw on sustainable phosphorus management
Source: Copernicus journal article supplement (doi:10.5194/soil-2021-49), 2021-06-18
Supplement: Supplementary file [file soil-2021-49-AC2-supplement.pdf]

Dear Editors and Reviewers,

Thank you very much for your comments and suggestions.

My manuscript, **Effects of application of biochar and straw on sustainable phosphorus management**, was revised according to the editor and reviewers' comments, and the itemized response to editor and each reviewer's comments is attached. We want to thank you sincerely for editors and reviewers' comments and suggestions and we feel so sorry that so much of your precious time was wasted on our paper revision. Those comments are all valuable and very helpful for revising and improving our paper, and we really learned a lot. We appreciate for editors and reviewers' warm work earnestly and we have studied comments carefully and have made corrections which we hope meet with approval. We use the MS Word Track Changes function to correct the manuscript as suggestions. The main corrections in the manuscript and the responds to the reviewer' comments and suggestions are as flowing:

Once again, we thank both editor and reviewers for their positive and constructive comments and suggestions.

Replies to RC2:

**L. 97. to study, to monitor, to assess?**

Answer: We are very sorry that I did not make it clear. We have corrected it. Thank you for your attention.

**L. 115. Expressed as P, K or P<sub>2</sub>O<sub>5</sub>, K<sub>2</sub>O?**

Answer: We have corrected it. Thank you for your attention.

**L. 121. The indicated pyrolysis conditions are not very specific**

Answer: Because the production process of biochar can't be written at will, we don't have the intellectual property right, so we didn't write it in detail.

L. 131. Use SI units for size

Answer: We have corrected it. Thank you for your attention.

L. 135. 136 Manufacturer city?

Answer: We have added Manufacturer city. Thank you for your attention.

L. 139. How does this elemental analyzer distinguish between organic and inorganic C?

Answer: Organic carbon and inorganic carbon are not mentioned in this paper.

L. 201.

Answer: we did not make it clear. We have corrected it.

L.227. Change this sentence, it is not clear what you mean by 'on fertilization'

Answer: We have corrected it. Thank you for your attention.

L. 245. The sentence 'most of the inorganic P in the soil is used up by plants and  
246 microorganisms' must be rewritten. Most of the soil P is in insoluble and hardly available  
inorganic forms

Answer: We have corrected it. Thank you very much for your professional comments and suggestions.

L. 260. 261 It is not clear what you mean by after correction; The sentence the concentration values of monoester before and after correction were obtained in SNPK-treated soil is not understandable

Answer: We have corrected it. Thank you very much for your professional comments and suggestions.

L. 270. No tengo claro si esto sirve para algo y si la correlación es verdadera.

Answer: We get the data through *Person coefficient* calculation, and discuss the relationship between them. Thank you for your attention.

L. 303. This is data that is not shown in the article

Answer: We have corrected it. Thank you very much for your professional comments.

L. 339.

Answer: We have corrected it. Thank you very much for your professional comments and suggestions.

L. 340. Data not shown

Answer: We have corrected it. Thank you very much for your professional comments.

L. 350. Answer: We have corrected it. Thank you very much for your professional comments.

Answer: We have corrected it. Thank you very much for your professional comments.

L. 354. It's not understood

Answer: We are very sorry that we did not make it clear. We have revised it. Thank you for your attention.

L. 355. This cannot be inferred from the TP data in table 1; This cannot be inferred from the TP data in table 1

Answer: We have corrected it. Thank you very much for your professional comments.

L. 366. How do you get there?

Answer: We are very sorry that our carelessness caused the wrong expression. We have corrected it. Thank you very much for your professional comments.

L. 413. How do you get there?

Answer: We are very sorry that we did not make it clear. We have revised it. Thank you very much for your professional comments.

We tried our best to improve the manuscript and made some changes to the manuscript. Thank you for your time and patience. Thank you very much for your good comments and suggestion. Once again, we appreciate for your warm work earnestly.

With best wishes!
