# Supplementary material for: Effects of application of biochar and straw on sustainable phosphorus management
Source: Copernicus journal article supplement (doi:10.5194/soil-2021-49), 2021-06-18
Supplement: Supplementary file [file soil-2021-49-RC2-supplement.pdf]

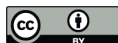

1 **Effects of application of biochar and straw on sustainable phosphorus**  
2 **management**

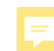

3 Xue Li <sup>a,b</sup>, Na Li <sup>a,b,\*</sup>, Jinfeng Yang <sup>a,b</sup>, Yansen Xiang <sup>a,b</sup>, Xin Wang <sup>a,b</sup>, Xiaori Han  
4 <sup>a,b,\*</sup>

5 <sup>a</sup> College of Land and Environment, Shenyang Agricultural University, Shenyang, China

6 <sup>b</sup> Monitoring & Experimental Station of Corn Nutrition and Fertilization in Northeast Region,  
7 Ministry of Agriculture, Shenyang, China

8

9 Corresponding author: [lnxlina@163.com](mailto:lnxlina@163.com) (Na Li); [hanxr@syau.edu.cn](mailto:hanxr@syau.edu.cn) (Xiaori Han)

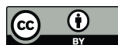

10 **Abstract**

11 Excessive use of phosphorus (P) in farmland soil and improper disposal of crop residues such  
12 as straws accelerate the consumption of P resources and cause a high level of air and water  
13 pollution, which are the main limiting factors for sustainable agricultural development. The  
14 most important alternative is the introduction of organic fertilizers to replace mineral P fertilizer.  
15 However, the type of organic fertilizers and management methods differ significantly. In this  
16 study, we used solution  $^{31}\text{P}$  nuclear magnetic resonance spectra and Hedley fractionation  
17 method to characterize the P compounds in the initial soil (in 2013; CK0), long-term unfertilized  
18 (CK) soil, and the soils treated with N+P+K mineral fertilizer (NPK), biochar in combination  
19 with NPK fertilizer (CNPk), and corn straw in combination with NPK fertilizer (SNPK). The  
20 results showed that adding biochar significantly increased the concentration of P. However,  
21 Olsen-P was found to be the highest ( $21.88 \text{ mg kg}^{-1}$ ) in SNPK. The concentration of Hedley-P  
22 was the highest ( $574.76 \text{ mg kg}^{-1}$ ) in CNPK. The inorganic P forms were significantly increased  
23 by adding biochar (up to 183.9%). The concentration of orthophosphate is positively relative to  
24 Resin-P,  $\text{NaHCO}_3$ -inorganic P (Pi; organic P (Po)), NaOH-Po, and Residual-P, which are  
25 absorbed and utilized to plants and microorganisms. Adenosine monophosphate (AMP) and  
26 inositol hexakisphosphate (IHP) are potential sources of P. Compared to the direct application  
27 of straw, adding biochar increases the available P in the different soil and reduces environmental  
28 pollution.

29

30 **Keywords**

31 Biochar, Straw, Phosphorus resources, Field, Nuclear magnetic resonance, Phosphorus forms  
32 and Hedley-P



## 33 1. Introduction

34 Phosphorus (P) is a main limiting factor of plant productivity and plays an important role  
35 in maintaining the ecological balance of the system. The abundance and supply of P in the soil  
36 directly affect the productivity of plants. P has complex conversion relationships due to human  
37 activities and geochemical processes (Okin, et al., 2004). Among them, farmland P is mainly  
38 affected by different fertilization methods and environmental conditions. However, continuous  
39 large-scale P fertilizer application leads to the enrichment of P in farmland soil and decreases  
40 its effectiveness. Thus, even though the P content in farmland soil is high, a large amount of P  
41 fertilizer is still applied every year in order to ensure a good crop yield. Therefore, it is crucial  
42 to study the different forms of P in the soil for the sustainable management of P.

43 The content of the forms of P in the soil is affected by many factors such as soil pH, soil  
44 properties, organic matter, and microbial activity (Brucker, et al., 2020). Various P forms in the  
45 soil affect the P uptake by microorganisms and crops (Slazak, et al., 2010). P is generally  
46 divided into inorganic P and organic P forms in the soil (Haygarth, et al., 2018), but only part  
47 of the P forms are absorbed by the crops (Smolders et al., 2020). Some studies have shown that  
48 the types of fertilizers and fertilization practices alter the soil P forms (Deiss et al., 2016). Straw  
49 is the most abundant organic resource (Karami, et al., 2012), which enhances the soil quality,  
50 microbial activity, soil pH, and activates fixed P (Niu, et al., 2011) on its application to the  
51 fields. It plays an important role in the efficient utilization of P. Earlier studies have indicated  
52 that the application of residual straw on the field can increase the available P and total P contents  
53 in the soil. However, the P activation coefficient of the applied straw is lower than that of the  
54 unutilized straw (Zheng et al., 2019), and thus increases the conversion of organic P to inorganic  
55 P in the soil (Li, et al., 2019). In addition, the straw is converted to biochar and applied to the  
56 field.

57 On the one hand, it solves the problem of air pollution caused by burning straw caused by  
58 a large number of straws that are nowhere to be placed. On the other hand, it has shown great  
59 application potential in improving agricultural soil and other aspects. Ever since the  
60 introduction of biochar in the 1960s, its significance on the environment and agriculture has  
61 been widely recognized. Studies have shown that adding biochar reduces the fixation of P in  
62 different soil, promotes the activation of soil that cannot directly accommodate P, and affects  
63 the distribution of P in the soil (Lehmann et al., 2003). The biochar carries P by itself and thus  
64 results in a simple mechanism of P release. The carbonization process of biochar promotes the  
65 release of phosphate from the woody tissues of plant residues, thereby acting as an available

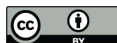

66 source of soil-soluble and exchangeable P (Gundale and DeLuca, 2006). The addition of crop  
67 straw and its conversion to biochar for application on the field can reduce environmental  
68 pollution caused by the burning of straw, improve the efficient use of resources (Wang et al.,  
69 2017), and increase the soil enzyme activity, microbial biomass carbon (C), nitrogen (N) and P  
70 contents, and microorganisms. Diversity suddenly improves the environment of the  
71 microorganisms, which influences the soil ecological environment (Wang et al., 2020).  
72 Therefore, to better understand how biochar addition adjusts the P forms in the field soil is very  
73 important for sustainable P resource management (McBeath, et al., 2012).

74 NMR spectroscopy is widely used to obtain detailed information about soil P (Cade-  
75 Menun and Liu, 2014). In addition, Hedley et al. (1982) ~~proposed a new P grading technique.~~  
76 Compared to the traditional grading methods, this technique can better reflect the dynamic  
77 changes in the soil P. It resolves the limitations of the traditional grading methods that cannot  
78 consider both inorganic and organic P forms and is thus adopted by many scholars (Wang et al.,  
79 2020). Obtaining the information of the grading of soil P and forms of P can more clearly  
80 exemplify the biological cycle of P, change in the P forms due to the process of soil formation,  
81 and effects of tillage, fertilization, and environmental factors on the soil P forms (Zamuner, et  
82 al., 2008). However, it is a lack of information on the effect of adding biochar to the field on  
83 the grading of P and forms of P.

84 In China, a large volume of straws is burned that causes environmental pollution. In recent  
85 years, to prevent air pollution, straws have been directly returned to the field or made into  
86 biochar and added to the field. It has been found that biochar can improve the soil environment.  
87 The resource utilization efficiency can repair or avoid certain environmental pollution, and  
88 reduce greenhouse gas emissions. So far, the soil environmental effects of biochar have  
89 attracted much attention. The effects of biochar in carbon sequestration, emission reduction,  
90 soil improvement and fertilization have been well studied. However, the effects of direct adding  
91 straw and biochar on the soil P compounds and the relationship between Hedley-P and P forms  
92 are still unclear. In addition, to the different properties of biochar used in different studies, the  
93 complex interaction between biochar and soil with different physical and chemical  
94 characterizations makes the comprehension of the results difficult. In this study, the application  
95 of the Hedley fractionation method and NMR spectroscopy were used to determine the P  
96 compounds in different types of soils, namely unfertilized soil and soils treated with mineral  
97 fertilizers, straw, and biochar. The purposes of present study were to 1) the changes of P  
98 component and P form in the soil under the direct return of straw to the field and the production  
99 of biochar; and 2) the relationship between Hedley-P and distribution of different P forms in



100 the soil. We studied the reduction of environmental pollution caused by stubble burning, rational  
101 use of resources, sustainable and comprehensive P management.

## 102 **2. Materials and Methods**

### 103 *2.1. Test Site*

104 This study was performed in the field location set for the biochar consumption test  
105 (40°48'N, 123°33'E) in Shenyang Agricultural University, China, which was established in  
106 2013. The test area is located in the southern center of the Songliao Plain, which has a temperate  
107 humid-semi-humid monsoon climate with an average annual rainfall of 736 mm, an average  
108 annual temperature of 7.5 °C. According to the FAO classification, the soil in the region belongs  
109 to the Haplic Luvisol profile (FAO, 1996). The continuous cropping of spring corn, namely  
110 “Dongdan 6531”, was taken as the experimental planting mode. This crop variety was  
111 cultivated in one season per year.

112 Different fertilizations were used as CK0, CK, NPK, CNPK, and SNPK. Here, CK0  
113 represents the initial soil in 2013; and CK is the unfertilized soil in 2018; NPK (mineral N, P,  
114 and K fertilizer); CNPK (biochar + N, P, and K fertilizer); SNPK (corn straw + N, P, and K  
115 fertilizer). The biochar was applied at a rate of 3000 kg ha<sup>-1</sup>. The straw was applied at a rate of  
116 9000 kg ha<sup>-1</sup>. The N, P, and K fertilizers were applied at a rate of 195 kg ha<sup>-1</sup>, 39.3 kg ha<sup>-1</sup> and  
117 62.2 kg ha<sup>-1</sup>, respectively. Each treatment was repeated thrice. The fertilizers to be tested were  
118 urea (N 46%), superphosphate (P 5%), and potassium chloride (K 42%). Biochar and straw  
119 were obtained using corn straw as the raw material. The basic physical and chemical  
120 characteristics of biochar (the temperature required for the formation of carbon (C) is about 450  
121 - 600 °C) were as follows: pH of 8.8, total C concentration of 49.08%, total N concentration of  
122 1.44%, total P<sub>2</sub>O<sub>5</sub> concentration of 0.85%, total K<sub>2</sub>O concentration of 3.20%, the specific  
123 surface area of 26.92 m<sup>2</sup> g<sup>-1</sup>, pore volume of 0.0425 cm<sup>3</sup> g<sup>-1</sup>, pore size of 7.12 nm, and ash  
124 content of 33.5%. The basic physical properties of straw were as follows: total C concentration  
125 of 42.08%, total N concentration of 0.96%, total P<sub>2</sub>O<sub>5</sub> concentration of 0.72%, and total K<sub>2</sub>O  
126 concentration of 0.87%.

### 127 *2.2. Test Soil*

128 The soil samples were taken from a soil layer of 0-20 cm after being harvested in 2018.  
129 The “S” five-point sampling was about 500 g, and the soil was evenly mixed to remove the  
130 plant roots and senescent plant tissue residues. The soil was naturally air-dried and sieved



131 through 20 and 100 mesh sieves.

### 132 2.3. Laboratory analysis

133 The available N in the soil was analyzed using 1.0 mol L<sup>-1</sup> of NaOH by the alkali diffusion  
134 method (Yi ong, et al., 2008). Olsen-P was analyzed using 0.5 mol L<sup>-1</sup> of NaHCO<sub>3</sub> by the  
135 molybdenum-antimony anti-colorimetric method (Olsen, et al., 1954). The available K was  
136 evaluated using 1.0 mol L<sup>-1</sup> of NH<sub>4</sub>OAc via the flame photometric method (Carson, 1980). The  
137 pH of water: soil was 2.5:1, which was measured using the Lei Magnetic PHS-3C type pH  
138 meter, China. Total P content was determined by sodium hydroxide melting-molybdenum-  
139 barium colorimetric method (Lu et al., 1996). The soil C and N contents were determined by  
140 the elemental analyzer (Elemental III, Germany). 

### 141 2.4. Determination of phosphorus fraction

142 In present study, the Hedley-P fractions were grouped into seven soil P fractions (Table 2)  
143 on the basis of the previous studies (Tiessen and Moir, 1993). 1) About 0.5 g (100 mesh) of the  
144 soil samples were taken in 50 ml screw-cap centrifuge tubes. To these samples, 30 mL deionized  
145 water and two saturated HCO<sub>3</sub><sup>-</sup> anion resin membranes were added and shaken for 16 h. The  
146 resin bag was removed and shaken in 0.5 mol L<sup>-1</sup> HCl solution for 16 h. The inorganic  
147 phosphorus was determined by the molybdenum blue method and labeled as Resin-P. 2). The  
148 soil residue was centrifuged in the centrifuge tube at 0 °C for 10 min at 25000 ×g, which was  
149 filtered and rinsed with 30 ml NaHCO<sub>3</sub>. The solution was shaken for 16 h and then centrifuged  
150 for 10 min. The supernatant was divided into two parts, among which 0.9 mol L<sup>-1</sup> H<sub>2</sub>SO<sub>4</sub> was  
151 added to one portion, labeled as NaHCO<sub>3</sub>-Pi (NaHCO<sub>3</sub> extracts inorganic P, mainly adsorbed  
152 on the surface of the soil, and this part of the P is effective.), which was frozen and centrifuged  
153 for further analysis. To another portion, ammonium sulfate was added and heated to 121 °C in  
154 an autoclave for 1 h, which was labeled as NaHCO<sub>3</sub>-Po (NaHCO<sub>3</sub> extracts organic P, which is  
155 easy to mineralize and can be used by plants in a short period of time). 3) The soil was washed  
156 with 30 mL NaOH on the filter membrane into the centrifuge tube. The sample was shaken for  
157 16 h, centrifuged for 10 min, and filtered. The supernatant was divided into two parts, among  
158 which 0.9 mol L<sup>-1</sup> of H<sub>2</sub>SO<sub>4</sub> was added to one portion, which was further frozen and centrifuged  
159 for analysis and labeled as NaOH-Pi (Inorganic P extracted with NaOH, chemically adsorbed  
160 to the soil Fe, Al compounds and on the surface of clay particles). To another portion,  
161 ammonium sulfate was added and heated to 121 °C in an autoclave for 1.5 h and labeled as  
162 NaOH-Pt (NaOH extracted total P). NaOH-Po (organic P) = NaOH-Pt–NaOH-Pi. 4) The soil



163 was washed with 30 mL of 1 mol L<sup>-1</sup> HCl using a filter membrane into the centrifuge tube. The  
164 sample was shaken for 16 h, centrifuged for 10 min, and filtered. The supernatant was labeled  
165 as HCl-Pi and taken for analysis. 5) About 10 ml of concentrated HCl was added to the soil  
166 residual sample. This was kept in a water bath heated up to 80 °C for 10 min. About 5 ml of  
167 concentrated HCl was added to the sample and centrifuged for 10 min. The supernatant was  
168 taken for analysis and labeled as HCl-Pt (HCl extracted total P). HCl-P = HCl-Pt–HCl-Pi. 6)  
169 To the soil residue, 5 mL of concentrated H<sub>2</sub>SO<sub>4</sub> was added. This was treated with H<sub>2</sub>O<sub>2</sub> and  
170 digested repeatedly at 360 °C. The sample was shaken, filtered, and left undisturbed for some  
171 time. The supernatant was labeled as Residual-P.

## 172 2.5. Spectral processing

173 The liquid-state <sup>31</sup>P NMR spectroscopy of the soil samples (extracts) was analyzed using  
174 the AVANCE III Bruker-500MHz nuclear magnetic resonance instrument manufactured by  
175 Swiss Bruker installed in Jilin University and Shenyang Agriculture University (Abdi, et al.,  
176 2014; Li et al., 2020). The pretreatment of the soil sample was performed as follows: About  
177 3.00 g of the sample that was passed through a 2 mm sieve into a 100 ml centrifuge tube was  
178 taken, which was treated with a 60 mL mixture of 0.25 mol L<sup>-1</sup> NaOH and 0.05 mol L<sup>-1</sup>  
179 Na<sub>2</sub>EDTA extractant at a water-soil ratio of 20:1. After mixing, the sample was shaken at 20 °C  
180 for 16 h, centrifuged (20 °C, 10000 g, 20 min), and filtered the supernatant using a 0.45-micron  
181 filter membrane. About 15 mL of the extract was frozen. The lyophilized sample was  
182 redissolved with 1 mL of 0.25 mol L<sup>-1</sup> NaOH and centrifuged (4 °C, 10000 g, 5 min). The  
183 supernatant was separated out. About 0.6 mL of the supernatant was treated with 0.05 mL of  
184 D<sub>2</sub>O and transferred to a 5 mm NMR tube to perform the analysis. At the same time, 5 ml of  
185 the filtered extract was digested using the H<sub>2</sub>SO<sub>4</sub>-HClO<sub>4</sub> mixture, and the total phosphorus  
186 content of the soil was determined by ICP-OES. The 85% orthophosphoric acid was used as  
187 the standard substance (Cade-Menun et al., 2015), and its chemical shift was set to 6 ppm.  
188 Although the <sup>31</sup>P-NMR spin-lattice relaxation times were not measured for these samples, the  
189 delay time was estimated to be sufficient on the basis of the ratio of P/ (Fe + Mn) in these  
190 extracts (Cade-Menun and Liu, 2014). Also, the MestReC software was used to plot the nuclear  
191 magnetic resonance spectra and calculate the integrals and peak areas.

## 192 2.6. Statistical analysis

193 In this study, the statistical analyses were performed using SPSS 21.0 (IBM Corp., Armonk,  
194 NY, USA). In addition, the data was presented as the arithmetic mean with standard deviations.



195 The one-way ANOVA was performed to compare the effects of the five treatments on the soil  
196 properties and P extraction efficiencies of NaOH and EDTA. The least significant difference  
197 (LSD) test was performed to determine the significance ( $P < 0.05$ ) of the differences in the P  
198 compounds during different treatments. The correlations between the P fractions and P forms  
199 were examined by calculating Pearson's correlation coefficients.

### 200 3. Results

#### 201 3.1. Soil characterizes the treatments

202 The concentration of organic C and the total amount of N, P, and Olsen-P in the soil were  
203 extremely increased by fertilization (Table 1). Compared to the initial soil (CK0), the content  
204 of available N in the soil was significantly decreased by long-term cropping or fertilization.  
205 However, compared to CK, the concentration of the available N was ~~extremely~~ increased by  
206 adding biochar. The application of NPK fertilizer or biochar and straw on the field had  
207 significant effects on the efficiency of extraction of P by NaOH and EDTA. Besides, the  
208 application of biochar gave the most significant results as the total P content was the highest in  
209 CNPK (Table 1). The soil pH was decreased by long-term planting or the addition of NPK  
210 fertilizers, but the application of straw or biochar (NPK+ Straw, NPK+ Biochar) effectively  
211 reduce the decline in pH (Table 1).

#### 212 213 3.2. Determination of phosphorus using the Hedley fractionation method in soil with mineral 214 fertilizer, biochar, and straw

215 Due to long-term fertilization or cropping, the P accumulated in the soil occurred in  
216 different forms. Each form was influenced and restricted by the other to a certain extent and  
217 always acquired a dynamic balance. The content and distribution of various P forms in different  
218 treatments were determined (Table 2 and Figure 1). Among them, the concentration of Resin-P  
219 was increased up to 2.2 times that of CK treatment by adding biochar. In addition, the  
220 proportions of stable P components (HCl-P and Residual-P) were lowest in CNPK-treated soil  
221 (Figure 1). Moreover, the proportions of labile P components (Resin-P,  $\text{NaHCO}_3\text{-Pi}$ , and  
222  $\text{NaHCO}_3\text{-Po}$ ) were highest in CNPK-treated soil, which were increased by 121.8%, 61.7%, and  
223 28.0%, respectively, compared to the CK treatment. Specifically, the content of Resin-P was  
224 highest in CNPK-treated soil that was easily absorbed by the plant. Also, the content of  
225  $\text{NaHCO}_3\text{-P}$  (Pi and Po) was increased by the application of biochar, which was twice the value  
226 of CK-treated soil. Accordingly, the concentration of labile and moderately labile P components





227 (NaOH-Pi and NaOH-Po) differed among the treatments. On fertilization, the effect was found  
228 to be in the following order: CNPK > SNPK > NPK > CK0 > CK (Table 2).

### 229 3.3. Identification of phosphorus compounds by 31-phosphorus NMR

230 In this study, five P compounds (orthophosphate, pyrophosphate, polyphosphate,  
231 monoester, diester, and phosphonate) were found in all the soil samples (Figure 2). Among these  
232 compounds, the concentrations of phosphonates, pyrophosphates, diesters, and monoesters  
233 were higher in different treatments. In addition, the concentrations of the monoesters were  
234 different in all the P compounds during the five treatments (Figure 3). The AMP peaks appeared  
235 in the samples undergoing all the treatments except for those labeled as CK0. Furthermore, no  
236 DNA peak was detected in the CK-treated soil. Inositol hexakisphosphate (IHP) accounted for  
237 a vast majority (5.6–3.3 ppm) of the processed monoesters. Four types of IHPs were identified,  
238 namely, myo-inositol hexakisphosphate (myo-IP<sub>6</sub>), scyllo-inositol hexakisphosphate (scyllo-  
239 IP<sub>6</sub>), neo-inositol hexakisphosphate (neo-IP<sub>6</sub>), and D-chiro-inositol hexakisphosphate (D-IP<sub>6</sub>),  
240 among which myo-IP<sub>6</sub> constituted the highest proportion. Neo-IP<sub>6</sub> (4.28 ±0.01 ppm) was  
241 detected in the soils undergoing CK0 and SNPK treatments. D-IP<sub>6</sub> (4.35 ±0.01 ppm) was  
242 detected in the CK0, and CNPK treated soils.

243

### 244 3.4. The distribution of phosphorus forms in different treatments

245 In most of the treatments, most of the inorganic P in the soil is used up by plants and  
246 microorganisms. The organic P in the soil included inositol phosphate, phospholipids, nucleic  
247 acids, a small amount of phosphoprotein, phosphate sugar, and microbial P. The organic P  
248 compounds were easily decomposable and acted as the source of available P in the soil. The  
249 components and their distribution and increase in the content of inorganic P were highly  
250 significant for understanding the supply status of soil P. The LSD results of the concentration  
251 of P compounds in the treated soils are shown in Table 3. The results showed that the highest  
252 concentration of orthophosphate was observed in CNPK-treated soil, followed by the NPK-  
253 treated type. IHP was found to be the major component among the monoesters. The total  
254 concentration of inorganic P showed the maximum value in CNPK-treated soil (79.8%, 173.2  
255 mg kg<sup>-1</sup>). In addition, the total concentration of organic P in the SNPK-treated soil was 2.3  
256 times that undergoing CK treatment. The concentration of orthophosphate varied up to 166.2  
257 mg kg<sup>-1</sup> and 91.6 mg kg<sup>-1</sup> in CNPK- and CK0-treated soils, respectively. The concentration of  
258 pyrophosphate were the lowest (0.8% and 1.7 mg kg<sup>-1</sup>) in CNPK-treated soil and highest in the



259 soil treated with straw, which were 5.4 times and 4.9 times that of the NPK-treated soil,  
260 respectively. After correction, there was no significant difference between the soil samples  
261 undergoing CK0 and SNPK treatments. However, the concentration values of monoester before  
262 and after correction were obtained in SNPK-treated soil. The lowest values for the concentration  
263 before the diester correction were observed in CK-treated soil. After correction, the lowest value  
264 was still observed in CK-treated soil, while the highest value was observed in the CK0-treated  
265 type. The Mo/Di ratio was decreased after the correction. The maximum concentration in the  
266 SNPK-treated soil was  $41.2 \text{ mg kg}^{-1}$ . Long-term non-fertilization leads to the disappearance of  
267 DNA. The concentration of DNA were extremely decreased by long-term fertilization. However,  
268 the application of biochar remarkably increased these values compared to other fertilization  
269 treatments (Table 3).

### 270 3.5. Correlations between the phosphorus forms and their fractions

271 The correlation analysis of the concentration of different P forms with their fractions  
272 indicated (Table 4) that the orthophosphate showed a significant positive correlation with all  
273 the soil P fractions ( $P < 0.01$ ), except for NaOH-Pi and HCl-P. Pyrophosphate exhibited a  
274 negative correlation with all the P fractions and a significant correlation with Resin-P,  $\text{NaHCO}_3$ -  
275 Po, and Residual-P ( $P < 0.05$  or  $P < 0.01$ ). The monoester after correction showed a significant  
276 negative correlation with NaOH-P and Residual-P ( $P < 0.05$  or  $P < 0.01$ ). Furthermore, the diester  
277 after correction had an insignificant correlation with the six P fractions. Moreover, IHP was  
278 positively correlated to NaOH-Pi and Residual-P ( $P < 0.05$ ). As a result, AMP showed a  
279 significant positive correlation with  $\text{NaHCO}_3$ -Pi,  $\text{NaHCO}_3$ -Po, NaOH-Pi, and NaOH-Po  
280 ( $P < 0.01$  or  $P < 0.05$ ). Among all the P fractions, the content of DNA was significantly positively  
281 relative to labile P ( $\text{NaHCO}_3$ -Po;  $P < 0.05$ ).

## 282 4. Discussion

### 283 4.1. Effects of mineral fertilizers, biochar, and straw on soil properties

284 The results of present study resemble the findings of Schjøning et al. (1994), who  
285 reported that the soil treated with mineral fertilizers had the lowest pH, while the addition of  
286 straw or biochar slowed down the decrease in the pH value. Due to a large number of mineral  
287 carbonates and a surface rich in acidic functional groups, biochar is generally alkaline.  
288 Therefore, the continuous large-scale adding biochar significantly slowed down the  
289 acidification of the soil. The concentration of soil P and its availability increased by the



290 application of biochar or straw (Steiner et al., 2007). There was a long-term supply of P to the  
291 soil attributing to the high proportion of soluble phosphate residues in the biochar prepared by  
292 low-temperature pyrolysis, its stable physical and chemical properties, and strong anti-  
293 decomposition and anti-oxidation capabilities. Therefore, the continuous application of biochar  
294 inevitably leads to the accumulation of available P in the soil. In addition, biochar has high  
295 anion and cation exchange capacities. An increase in the anion exchange capacity can affect the  
296 interaction between the soil and external P, resulting in an increase in the availability of P  
297 (Uzoma et al., 2011). Also, the concentration of Olsen-P was the highest in the soil treated with  
298 straw, indicating the potential of straw in the activation of P in the soil compared to NPK. Due  
299 to the abundance of C in biochar and straw, their addition increased the organic C content in the  
300 soil. In addition to the large concentration of organic matter, biochar showed unique physical  
301 properties. The results of this study revealed that the concentration of N pool in the soil was  
302 significantly increased by the application of mineral fertilizer compared to the treatment with  
303 biochar or straw. This may be attributed to the increase in the uptake of N by the high yields of  
304 the crop obtained on the addition of biochar or straw to the soil. In addition, the activity of N  
305 was increased by the addition of biochar, attributing to its strong retention effect on N  
306 (Dandamudi et al., 2021). On the one hand, the porous characteristics and huge specific surface  
307 area of biochar affected the concentration of N in the soil, resulting in its adsorption. On the  
308 other hand, the addition of biochar directly or indirectly affected the microbial diversity,  
309 abundance, and activity during the soil turnover process and further affected the N cycle of the  
310 soil (Spokas and Reicosky, 2009). Doydora et al. (2011) showed that the combination of biochar  
311 with organic fertilizers significantly reduced the volatilization of ammonia in the soil.  
312 Taghimadeh-Toosi et al. (2012) used the isotope tracing method to conclude that the biochar  
313 showed not only obvious adsorption capacity for NH<sub>3</sub> but also improved the utilization of N by  
314 the plant.

#### 315 4.2. Effects of the addition of chemical fertilizers, biochar, or straw on the phosphorus content 316 of the soil

317 The results of this study showed that the proportion of Residual-P (stable P, which is  
318 extremely difficult to be used by plants under normal conditions) in the soil was decreased by  
319 fertilization. However, the concentrations of NaHCO<sub>3</sub>-Pi (the effective P mainly adsorbed on  
320 the soil surface and similar in ratio to that of Olsen-P) and NaOH-Pi (the amount of P on the  
321 surface of Fe, Al compounds and clay particles due to its chemical adsorption to the soil) were



322 increased (Figure 1). Fertilization increased the activity of P in the soil, which was consistent  
323 with the results obtained by Lee et al. (Lee, et al., 2004). Also, the concentration of Residual-P  
324 in the soil was not reduced by long-term planting or fertilization. This is attributed to the stable  
325 state of Residual-P that is not easily absorbed by the plants. The application of NPK highly  
326 increased the content of HCl -P and promoted the accumulation of available P in the soil. The  
327 effect of the addition of biochar notably increased the organic P fractions (NaHCO<sub>3</sub>-Po and  
328 NaOH-Po) in the soil. This may be attributed to the high proportion of soluble organic P in the  
329 soil, which retains the concentration of P during the pyrolysis process and mostly exists in the  
330 soluble form. The carbonization process of biochar promotes the release of P from the woody  
331 tissues of the plant residues, thereby acting as a direct source of soluble P in the soil (Gundale  
332 and DeLuca, 2006). The influence of biochar on the effectiveness of P can be achieved by  
333 changing the adsorption of P by the soil, which cannot be obtained from the results of the current  
334 study. Mukherjee (2011) speculated that the bridging effect of cations on the surface of biochar  
335 may also affect the effectiveness of P in the soil. The effect of biochar on the adsorption capacity  
336 of soil P was significantly correlated to many factors such as soil pH, background value of P,  
337 cation concentration, and microbial activity. NaHCO<sub>3</sub>-P is an effective source of P that can be  
338 easily absorbed by the crops. The study showed no significant difference in the fraction of  
339 NaHCO<sub>3</sub>-P by the addition of NPK fertilizer, biochar, or straw to the soil. This is attributed to  
340 the high crop yield and increased absorption of NaHCO<sub>3</sub>-P by the plants. Long-term planting  
341 without fertilization does not affect the change in the content of NaHCO<sub>3</sub>-P in the soil. In  
342 present study, long-term planting without fertilization of the soil was found to decrease the  
343 concentration of NaOH-Pi, which was highly increased by the application of mineral fertilizer.  
344 There was no significant difference in its concentration by the application of biochar and straw,  
345 as the concentration of inorganic P was mainly increased by the addition of mineral fertilizer to  
346 the soil (Jing, et al., 2019). Besides, the addition of biochar and straw can effectively activate  
347 the P in the soil (Huang et al., 2019) and increase crop absorption. The concentration of Resin-  
348 P was significantly increased by the addition of biochar compared to that of straw. This may be  
349 attributed to the special structure of biochar, which can stimulate stable P conversion with the  
350 increase in concentration, by adding biochar to increase the concentration of that can be  
351 absorbed by plants, or to stimulate the transformation of P form, it can effectively reduce the  
352 application of chemical fertilizers to the soil, reduce the consumption of resources, and reduce  
353 the water pollution caused by excessive application of P fertilizers. 

354 *4.3. Effects of the addition of NPK fertilizers, biochar, and straw on the soil P forms and buildup*



355 Total P content of the soil by the addition of straw was significantly lower than those  
356 obtained by the other treatments. This may be attributed to the increase in the absorption of P  
357 by the high yield of crops obtained by the addition of straw. The concentration of inorganic P  
358 was significantly increased by the addition of biochar. The biochar is rich in organic matter and  
359 long-chain molecular structures that possess good constraining ability toward the mineral  
360 particles of the soil. The adsorption capacity of the soil varies with pH. In acidic soil, the  
361 adsorption capacity of soil P increases (Hale et al., 2013). The influence of biochar on the  
362 adsorption capacity of soil P is significantly correlated with various factors such as the soil pH,  
363 P pool, cation concentration, and microbial activity. The total concentration of organic P was  
364 the highest in SNPK-treated soil. The application of mineral fertilizers converts the organic P  
365 in the soil to inorganic P forms (Nobile, et al., 2020). AMP appeared in the soil after long-term  
366 planting (Figure 2B). AMP is mainly related to microorganisms and is generally obtained by  
367 the partial degradation of diesters (He, et al., 2011). In this study, crops were planted for a long  
368 duration, and the corn stubbles were plowed into the soil to provide nutrients for microbial  
369 activities before the planting process (Koller, et al., 2013). The highest proportion of IHP in the  
370 soil was attributed to myo-IP<sub>6</sub>, as it was mainly derived from crop residues. In this experiment,  
371 long-term planting and application of straw resulted in plant residues. This was inconsistent  
372 with the results reported by Noack (2014) and Annaheim (2015). Neo-IP<sub>6</sub> and D-IP<sub>6</sub> are  
373 considered to be the products of microbial action (Turner, 2007), and their abundance reflect  
374 the resistance of these isomers to enzymatic hydrolysis (Cosgrove, 1970). These compounds  
375 were detected in CK0-treated soil. However, Neo-IP<sub>6</sub> was only detected in SNPK-treated soil,  
376 and D-IP<sub>6</sub> was only detected in the CNPK-treated sample. This may be attributed to the  
377 consumption of Neo-IP<sub>6</sub> and D-IP<sub>6</sub> present in the soil on long-term planting. The addition of  
378 NPK fertilizer does not affect their concentration. However, the addition of straw resulted in  
379 the detection of Neo-IP<sub>6</sub>, and the application of biochar resulted in the detection of D-IP<sub>6</sub>, the  
380 P nutrient (Neo-IP<sub>6</sub>, D-IP<sub>6</sub>), which may be taken up by the plants and microorganisms (Giles,  
381 et al., 2011). The porous structure of biochar provided a living environment for the  
382 microorganisms in the soil. The biochar soils that are rich in organic matter tend to be better  
383 than mineral soils. The organic matter in the soil increases its recovering ability under the  
384 compressed state and thus exhibits elasticity. At the same time, organic matter promotes the  
385 growth of microorganisms and crop roots, and their life activities further promote the formation  
386 of micro-aggregates in the soil (Frey, 2019). The concentration of the monoesters exhibited the  
387 same trend, which was similar to those shown by the proportion and concentration of diesters  
388 before and after calibration. The concentration of  $\alpha$ - and  $\beta$ -forms showed the least values upon



389 the addition of straw. This is attributed to  $\alpha$ - and  $\beta$ -forms being classified as phosphate diesters.  
390 The stable diester is destabilized by the addition of straw. Besides, they are easily converted to  
391 monoesters or exist in low concentrations.

#### 392 4.4. Phosphorus form and composition

393 This study indicated that Resin-P,  $\text{NaHCO}_3\text{-Pi}$ ,  $\text{NaHCO}_3\text{-Po}$ ,  $\text{NaOH-Po}$ , and Residual-P  
394 had a good correlation with orthophosphate. This may be attributed to the availability of these  
395 P fractions and their incompatibility with plants and microorganisms. The available states in  
396 plants and microorganisms were the effective components of soil P that were directly absorbed  
397 by the crops or used by the microorganisms in a short duration (Zheng, et al., 2003). The  
398 incompatible states included  $\text{NaOH-Po}$  and Residual-P. These forms were not directly used by  
399 plants within a short duration. However, the change in the external environment may transform  
400 them into a form that can be used by the plants and microorganisms (Wang, et al., 2019), such  
401 as orthophosphates (Schneider et al., 2016). Interestingly, pyrophosphate was negatively  
402 correlated to all the P fractions and showed a significant relationship with Residual-P, Resin-P,  
403 and  $\text{NaHCO}_3\text{-Po}$ . The same correlation was observed in the case of orthophosphate. When the  
404 content of orthophosphate was high, the content of pyrophosphate was lower. All the fractions  
405 except HCl-P were positively correlated to orthophosphate, indicating a balance in the  
406 proportion of pyrophosphate and orthophosphate in the soil. The content of pyrophosphate in  
407 the fertilized soil was low, which was consistent with the previous studies (Hu, et al., 2015).  
408 The correlation of the P fraction with IHP and was the same as that with the corrected monoester,  
409 as it is the major monoester in the soil (Noack et al., 2014). AMP is also a monoester, but its  
410 correlation with the P fraction is different from that of IHP. This may be attributed to the fact  
411 that AMP is formed by the partial degradation of diester (Doolette et al., 2009). Therefore, the  
412 existence of AMP must be considered comprehensively. Due to its significant positive  
413 correlation with  $\text{NaHCO}_3\text{-Pi}$  (Po) and  $\text{NaOH-Pi}$  (Po), the AMP can be indirectly or directly  
414 absorbed and utilized by the plants. DNA was significantly relative to  $\text{NaHCO}_3\text{-Po}$  due to their  
415 similar contribution toward utilization by the plants. The organic P compounds are not easily  
416 absorbed by plants (Cade-Menun, 2017). In addition to Residual-P, the corrected monoester  
417 showed a significant correlation with  $\text{NaOH-Pi}$ , while the corrected diester indicated a  
418 remarkable correlation with  $\text{NaHCO}_3\text{-Po}$  and HCl-P. This may be attributed to the changes  
419 caused by the  $\alpha$ - and  $\beta$ -forms before and after correction. Thus, it is indirectly inferred that the  
420  $\alpha$ - and  $\beta$ -forms may be related to  $\text{NaOH-Pi}$  and  $\text{NaHCO}_3\text{-Po}$  and act as effective P forms.

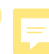



## 421 **5. Conclusions**

422 In this study, the soil P pool was found to increase by the addition of biochar obtained by  
423 the conversion of straw rather than the direct application of straw to the soil. The concentrations  
424 of labile P (Resin-P,  $\text{NaHCO}_3\text{-Pi}$ , and  $\text{NaHCO}_3\text{-Po}$ ) and moderate labile P ( $\text{NaOH-Pi}$  and  
425  $\text{NaOH-Po}$ ) were notably increased by the application of biochar. In addition, the concentration  
426 of inorganic P forms and AMP were significantly increased. The concentration of IHP were  
427 found to increase remarkably on the treatment of the soil with straw. **The P fractions that mainly**  
428 **contributed to orthophosphate in the soil** were Resin-P,  $\text{NaHCO}_3\text{-Pi}$  (Po),  $\text{NaOH-Po}$ , and  
429 Residual-P. AMP showed a significant correlation with labile P ( $\text{NaHCO}_3\text{-Pi}$  and  $\text{NaHCO}_3\text{-Po}$ )  
430 and moderate labile P ( $\text{NaOH-Pi}$  and  $\text{NaOH-Po}$ ). Thus, AMP was indirectly inferred to be a  
431 potential source of P. IHP had a remarkable correlative with  $\text{NaOH-Pi}$  and Residual-P. This  
432 indicated that the addition of biochar efficiently increased the content of plant-available P and  
433 potential P sources in the soil. The direct addition of straw can increase the potential source of  
434 P in the soil. The study showed that converting straw into biochar as a partial replacement  
435 fertilizer can solve the environmental pollution caused by a large amount of straw accumulation  
436 and straw burning. Further, it can improve resource utilization, slow down the consumption of  
437 effective P resources, and provide nutrients for crop growth. This is turn will improve the  
438 efficiency of fertilizer utilization and reduce the risk of water pollution caused by excessive  
439 application of chemical P.

440

## 441 **Conflict of interest**

442 The authors declare no competing financial interest.

443

## 444 **Acknowledgements**

445 This work was supported by the National Natural Science Funds Fund (No. 31972511)  
446 and the National Key Research and Development Program Institution, China (No.  
447 2017YFD0300700).

448

## 449 **References**

450 Abdi, D., Cade-Menun, B.J., Ziadi, N., Parent, L.É., 2014. Long-term impact of tillage practices  
451 and phosphorus fertilization on soil phosphorus forms as determined by  $^{31}\text{P}$  nuclear  
452 magnetic resonance spectroscopy. *Journal of Environmental Quality*, 43, 1431-1441.  
453 <https://doi.org/10.2134/jeq2013.10.0424>.



- 454 Annaheim, K.E., Doolette, A.L., Smernik, R.J., Mayer, J., Oberson, A., Frossard, E., 2015.  
455 Long-term addition of organic fertilizers has little effect on soil organic phosphorus as  
456 characterized by <sup>31</sup>P NMR spectroscopy and enzyme additions. *Geoderma*, 257-258,  
457 67-77. <https://doi.org/10.1016/j.geoderma.2015.01.014>.
- 458 Brucker, E., Kernchen, S., Spohn, M., 2020. Release of phosphorus and silicon from minerals  
459 by soil microorganisms depends on the availability of organic carbon. *Soil Biology and*  
460 *Biochemistry*, 143, 107737. <https://doi.org/10.1016/j.soilbio.2020.107737>.
- 461 Cade-Menun, B., Liu, C.W., 2014. Solution phosphorus-31 nuclear magnetic resonance  
462 spectroscopy of soils from 2005 to 2013: A review of sample preparation and  
463 experimental parameters. *Soil Science Society of America Journal*, 78, 19-37.  
464 <https://doi.org/10.2136/sssaj2013.05.0187dgs>.
- 465 Cade-Menun, B.J., 2017. Characterizing phosphorus forms in cropland soils with solution 31  
466 P-NMR: past studies and future research needs. *Chemical and Biological Technologies*  
467 *in Agriculture*, 4, 19. <https://doi.org/10.1186/s40538-017-0098-4>.
- 468 Cade-Menun, B.J., He, Z., Zhang, H., Endale, D.M., Schomberg, H.H., Liu, C.W., 2015.  
469 Stratification of phosphorus forms from long-term conservation tillage and poultry litter  
470 application. *Soil Science Society of America Journal*, 79, 504-516.  
471 <https://doi.org/10.2136/sssaj2014.08.0310>.
- 472 Carson, P., 1980. Recommended potassium test. In W. Dahnke (Ed.), *Recommended chemical*  
473 *soil test procedures for the north central region, Bulletin 499*. Fargo: North Dakota  
474 Agricultural Experiment Station.
- 475 Cosgrove, D., 1970. Inositol phosphate phosphatases of microbiological origin. Inositol  
476 phosphate intermediates in the dephosphorylation of the hexaphosphates of myo-  
477 inositol, scyllo-inositol, and D-chiro-inositol by a bacterial (*Pseudomonas* sp.) phytase.  
478 *Australian Journal of Biological Sciences*, 23, 1207-1220.  
479 <https://doi.org/10.1071/bi9701207>.
- 480 Dandamudi, K.P.R., Mathew, M., Selvaratnam, T., Muppaneni, T., Seger, M., Lammers, P.,  
481 Deng, S.G., 2021. Recycle of nitrogen and phosphorus in hydrothermal liquefaction  
482 biochar from *Galdieria sulphuraria* to cultivate microalgae. *Resources, Conservation*  
483 *and Recycling*, 171, 105644. <https://doi.org/10.1016/j.resconrec.2021.105644>.
- 484 Deiss, L., de Moraes, A., Dieckow, J., Franzluebbers, A.J., Gatiboni, L.C., Ianzi Sasaki, G.,  
485 2016. Soil phosphorus compounds in integrated crop-livestock systems of subtropical  
486 Brazil. *Geoderma*, 274, 88-96. <https://doi.org/10.1016/j.geoderma.2016.03.028>.
- 487 Doolette, A., Smernik, R., Dougherty, W., 2009. Spiking improved solution phosphorus-31





- 488 nuclear magnetic resonance identification of soil phosphorus compounds. *Soil Science*  
489 *Society of America Journal*, 73, 919-927. <https://doi.org/10.2136/sssaj2008.0192>.
- 490 Doydora, S.A., Cabrera, M.L., Das, K.C., Gaskin, J.W., Sonon, L.S., Miller, W.P., 2011. Release  
491 of nitrogen and phosphorus from poultry litter amended with acidified biochar.  
492 *International Journal of Environmental Research and Public Health*, 8, 1491-1502.  
493 <https://doi.org/10.3390/ijerph8051491>.
- 494 FAO., 1996. World reference base for soil resources. *Rome, Italy*.
- 495 Frey, S.D., 2019. Mycorrhizal fungi as mediators of soil organic matter dynamics. *Annual*  
496 *Review of Ecology, Evolution, and Systematics*, 50, 237-259.  
497 <https://doi.org/10.1146/annurev-ecolsys-110617-062331>.
- 498 Giles, C., Cade-Menun, B., Hill, J., 2011. The inositol phosphates in soils and manures:  
499 abundance, cycling, and measurement. *Canadian Journal of Soil Science*, 91, 397-416.  
500 <https://doi.org/10.4141/CJSS09090>.
- 501 Gundale, M.J., DeLuca, T.H., 2006. Temperature and source material influence ecological  
502 attributes of ponderosa pine and Douglas-fir charcoal. *Forest Ecology and Management*,  
503 231, 86-93. <https://doi.org/10.1016/j.foreco.2006.05.004>.
- 504 Hale, S.E., Alling, V., Martinsen, V., Mulder, J., Breedveld, G., Cornelissen, G., 2013. The  
505 sorption and desorption of phosphate-P, ammonium-N and nitrate-N in cacao shell and  
506 corn cob biochars. *Chemosphere*, 91, 1612-1619.  
507 <https://doi.org/10.1016/j.chemosphere.2012.12.057>.
- 508 Haygarth, P.M., Harrison, A., Turner, B., 2018. On the history and future of soil organic  
509 phosphorus research: a critique across three generations. *European Journal of Soil*  
510 *Science*, 69, 86-94. <https://doi.org/10.1111/ejss.12517>.
- 511 He, Z., Olk, D.C., & Cade-Menun, B.J., 2011. Forms and lability of phosphorus in humic acid  
512 fractions of Hord silt loam soil. *Soil Science Society of America Journal*, 75, 1712-1722.  
513 <https://doi.org/10.2136/sssaj2010.0355>.
- 514 Hedley, M., & Stewart, J., 1982. Method to measure microbial phosphate in soils. *Soil Biology*  
515 *and Biochemistry*, 14, 377-385. [https://doi.org/10.1016/0038-0717\(82\)90009-8](https://doi.org/10.1016/0038-0717(82)90009-8).
- 516 Huang, X.-f., Li, S.-q., Li, S.-y., Ye, G.-y., Lu, L.-j., Zhang, L., 2019. The effects of biochar and  
517 dredged sediments on soil structure and fertility promote the growth, photosynthetic and  
518 rhizosphere microbial diversity of *Phragmites communis* (Cav.) Trin. ex Steud. *Science*  
519 *of the Total Environment*, 697, 134073. <https://doi.org/10.1016/j.scitotenv.2019.134073>.
- 520 Jing, J., Christensen, J.T., Sørensen, P., Christensen, B.T., Rubæk, G.H., 2019. Long-term  
521 effects of animal manure and mineral fertilizers on phosphorus availability and silage



- 522 maize growth. *Soil Use and Management*, 35, 323-333.  
523 <https://doi.org/10.1111/sum.12477>.
- 524 Karami, A., Homae, M., Afzalnia, S., Ruhipour, H., Basirat, S., 2012. Organic resource  
525 management: impacts on soil aggregate stability and other soil physico-chemical  
526 properties. *Agriculture, Ecosystems & Environment*, 148, 22-28.  
527 <https://doi.org/10.1016/j.agee.2011.10.021>.
- 528 Koller, R., Robin, C., Bonkowski, M., Ruess, L., Scheu, S., 2013. Litter quality as driving factor  
529 for plant nutrition via grazing of protozoa on soil microorganisms. *FEMS Microbiology*  
530 *Ecology*, 85, 241-250. <https://doi.org/10.1111/1574-6941.12113>.
- 531 Lee, C.H., Park, C.Y., Do Park, K., Jeon, W.T., Kim, P.J., 2004. Long-term effects of  
532 fertilization on the forms and availability of soil phosphorus in rice paddy. *Chemosphere*,  
533 56, 299-304. <https://doi.org/10.1016/j.agee.2011.10.021>.
- 534 Lehmann, J., da Silva, J.P., Steiner, C., Nehls, T., Zech, W., Glaser, B., 2003. Nutrient  
535 availability and leaching in an archaeological Anthrosol and a Ferralsol of the Central  
536 Amazon basin: fertilizer, manure and charcoal amendments. *Plant and Soil*, 249, 343-  
537 357. <https://doi.org/10.1023/A:1022833116184>.
- 538 Li, F., Liang, X., Zhang, H., & Tian, G., 2019. The influence of no-till coupled with straw return  
539 on soil phosphorus speciation in a two-year rice-fallow practice. *Soil and Tillage*  
540 *Research*, 195, 104389. <https://doi.org/10.1016/j.still.2019.104389>.
- 541 Li, X., Wen, Q.-X., Zhang, S.-Y., Li, N., Yang, J.-F., Han, X., 2020. Long-term rotation  
542 fertilisation has differential effects on soil phosphorus. *Plant, Soil and Environment*, 66,  
543 543-551. <https://doi.org/10.17221/263/2020-PSE>.
- 544 Liu, J., Hu, Y., Yang, J., Abdi, D., Cade-Menun, B.J., 2015. Investigation of soil legacy  
545 phosphorus transformation in long-term agricultural fields using sequential  
546 fractionation, P K-edge XANES and solution P NMR spectroscopy. *Environmental*  
547 *Science & Technology*, 49, 168-176. <https://doi.org/10.1021/es504420n>.
- 548 Lu, R., Liu, H., Wen, D., Qin, S., Zhen, J., Wang, Z., 1996. Nutrient cycling and balance of  
549 agricultural ecosystem in different typical regions of China. II Parameters of nutrient  
550 input to farm land. *Chin. J. Soil Sci*, 27, 151-154.
- 551 McDowell, R., Condon, L., Stewart, I., 2008. An examination of potential extraction methods  
552 to assess plant-available organic phosphorus in soil. *Biology and Fertility of Soils*, 44,  
553 707-715. <https://doi.org/10.1007/s00374-007-0253-3>.
- 554 Mukherjee, A., 2011. *Physical and chemical properties of a range of laboratory-produced fresh*  
555 *and aged biochars*: University of Florida.



- 556 Niu, L.-A., Hao, J.-M., Zhang, B.-Z., Niu, X.-S., 2011. Influences of long-term fertilizer and  
557 tillage management on soil fertility of the North China Plain. *Pedosphere*, 21, 813-820.  
558 [https://doi.org/10.1016/S1002-0160\(11\)60185-9](https://doi.org/10.1016/S1002-0160(11)60185-9).
- 559 Noack, S.R., McLaughlin, M.J., Smernik, R.J., McBeath, T.M., Armstrong, R.D., 2014.  
560 Phosphorus speciation in mature wheat and canola plants as affected by phosphorus  
561 supply. *Plant and Soil*, 378, 125-137. <https://doi.org/10.1007/s11104-013-2015-3>.
- 562 Nobile, C., Bravin, M., Becquer, T., Paillat, J.-M., 2020. Phosphorus sorption and availability  
563 in an andosol after a decade of organic or mineral fertilizer applications: Importance of  
564 pH and organic carbon modifications in soil as compared to phosphorus accumulation.  
565 *Chemosphere*, 239, 124709. <https://doi.org/10.1016/j.chemosphere.2019.124709>.
- 566 Okin, G.S., Mahowald, N., Chadwick, O.A., Artaxo, P., 2004. Impact of desert dust on the  
567 biogeochemistry of phosphorus in terrestrial ecosystems. *Global Biogeochemical  
568 Cycles*, 18. <https://doi.org/10.1029/2003GB002145>.
- 569 Olsen, S.R., Watanabe, F.S., Cospser, H.R., Larson, W., Nelson, L., 1954. Residual phosphorus  
570 availability in long-time rotations on calcareous soils. *Soil Science*, 78, 141-152.  
571 <https://doi.org/10.1097/00010694-195408000-00008>.
- 572 Schjønning, P., Christensen, B.T., Carstensen, B., 1994. Physical and chemical properties of a  
573 sandy loam receiving animal manure, mineral fertilizer or no fertilizer for 90 years.  
574 *European Journal of Soil Science*, 45, 257-268. [https://doi.org/10.1111/j.1365-  
2389.1994.tb00508.x](https://doi.org/10.1111/j.1365-<br/>575 2389.1994.tb00508.x).
- 576 Schneider, K.D., Cade-Menun, B.J., Lynch, D.H., Voroney, R.P., 2016. Soil phosphorus  
577 forms from organic and conventional forage fields. *Soil Science Society of America  
578 Journal*, 80, 328-340. <https://doi.org/10.2136/SSSAJ2015.09.0340>.
- 579 Slazak, A., Freese, D., da Silva Matos, E., Hüttl, R.F., 2010. Soil organic phosphorus fraction  
580 in pine-oak forest stands in Northeastern Germany. *Geoderma*, 158, 156-162.  
581 <https://doi.org/10.1016/j.geoderma.2010.04.023>.
- 582 Smolders, E., Nawara, S., De Cooman, E., Merckx, R., Martens, S., Elsen, A., 2020. The  
583 phosphate desorption rate in soil limits phosphorus bioavailability to crops. *European  
584 Journal of Soil Science*. <https://doi.org/10.1111/ejss.12978>.
- 585 Spokas, K.A., Reicosky, D.C., 2009. Impacts of sixteen different biochars on soil greenhouse  
586 gas production. *Annals of Environmental Science*, 3, 179-193.
- 587 Steiner, C., Teixeira, W.G., Lehmann, J., Nehls, T., de Macêdo, J.L.V., Blum, W.E., 2007. Long  
588 term effects of manure, charcoal and mineral fertilization on crop production and  
589 fertility on a highly weathered Central Amazonian upland soil. *Plant and Soil*, 291, 275-



- 590           290. <https://doi.org/10.1007/s11104-007-9193-9>.
- 591 Taghizadeh-Toosi, A., Clough, T.J., Sherlock, R.R., Condrón, L.M., 2012. Biochar adsorbed  
592 ammonia is bioavailable. *Plant and Soil*, 350, 57-69. [https://doi.org/10.1007/s11104-](https://doi.org/10.1007/s11104-011-0870-3)  
593 011-0870-3.
- 594 Tiessen, H., Moir, J., 1993. Characterization of available P by sequential extraction. Soil  
595 Sampling and Methods of Analysis. *Ed. MR Carter. P*, 75-86.
- 596 Turner, B.L., 2007. Inositol phosphates in soil: amounts, forms and significance of the  
597 phosphorylated inositol stereoisomers. *Inositol phosphates: Linking agriculture and the*  
598 *environment*, 186-206.
- 599 Uzoma, K., Inoue, M., Andry, H., Fujimaki, H., Zahoor, A., Nishihara, E., 2011. Effect of cow  
600 manure biochar on maize productivity under sandy soil condition. *Soil Use and*  
601 *Management*, 27, 205-212. <https://doi.org/10.1111/j.1475-2743.2011.00340.x>.
- 602 Wang, H., Yan, S., Ren, T., Yuan, Y., Kuang, G., Wang, B., 2020. Novel environmental factors  
603 affecting microbial responses and physicochemical properties by sequentially applied  
604 biochar in black soil. *Environmental Science and Pollution Research*, 27, 37432-37443.  
605 <https://doi.org/10.1007/s11356-020-10081-y>.
- 606 Wang, L.F., Chen, C., Zhu, X.Y., Chen, J.L., Fang, X., 2019. Characteristics of soil phosphorus  
607 pool at different vegetation restoration stages in the mid-subtropical region of China.  
608 *Journal of Soil and Water Conservation*.
- 609 Wang, X.L., Li, Z.J., Long, P., Yan, L.L., Gao, W.S., Chen, Y.Q., Sui, P., 2017. Sustainability  
610 evaluation of recycling in agricultural systems by emergy accounting. *Resources,*  
611 *Conservation and Recycling*, 117, 114-124.  
612 <https://doi.org/10.1016/j.resconrec.2016.11.009>.
- 613 Wei, K., Bao, H., Huang, S., Chen, L., 2017. Effects of long-term fertilization on available P, P  
614 composition and phosphatase activities in soil from the Huang-Huai-Hai Plain of China.  
615 *Agriculture, Ecosystems & Environment*, 237, 134-142.  
616 <https://doi.org/10.1016/j.agee.2016.12.030>.
- 617 Xiong, Y., Xia, H., Cai, X.a., Fu, S., 2008. Impacts of litter and understory removal on soil  
618 properties in a subtropical *Acacia mangium* plantation in China. *Plant and Soil*, 304,  
619 179-188. <https://doi.org/10.1007/s11104-007-9536-6>.
- 620 Zamuner, E., Picone, L., Echeverria, H., 2008. Organic and inorganic phosphorus in Mollisol  
621 soil under different tillage practices. *Soil and Tillage Research*, 99, 131-138.  
622 <https://doi.org/10.1016/j.still.2007.12.006>.
- 623 Zheng, B.-X., Ding, K., Yang, X.-R., Wadaan, M.A., Hozzein, W.N., Peñuelas, J., 2019. Straw



624 biochar increases the abundance of inorganic phosphate solubilizing bacterial  
625 community for better rape (*Brassica napus*) growth and phosphate uptake. *Science of*  
626 *the Total Environment*, 647, 1113-1120. <https://doi.org/10.1016/j.scitotenv.2018.07.454>.  
627 Zheng, Z., Parent, L., MacLeod, J., 2003. Influence of soil texture on fertilizer and soil  
628 phosphorus transformations in Gleysolic soils. *Canadian Journal of Soil Science*, 83,  
629 395-403. <https://doi.org/10.4141/S02-073>.



630 **Figure captions**

631

632 **Figure 1.** The ratio of P compounds in the Hedley improvement method (1993) to the total  
633 phosphorus content in the soils undergoing different treatments.

634

635 **Figure 2.** Examples of solution <sup>31</sup>-phosphorus nuclear magnetic resonance spectra for the five  
636 treatments.

637

638 **Figure 3.** The solution <sup>31</sup>-phosphorus nuclear magnetic resonance spectra of the biochar-  
639 treated sample and the orthophosphate and monoester under different treatments in detail (5.4  
640 to 3.0 ppm). a: adenosine monophosphate; b: myo-Inositol hexakisphosphate; c: scyllo-Inositol  
641 hexakisphosphate; d: neo-Inositol hexakisphosphate; and e: D-chiro-Inositol hexakisphosphate.



642 Table 1 Basic properties of soil used in experiment and efficiency of P in NaOH-EDTA  
 643 extracts.

| Item                               | Initial soil  |    | No fertilizer |   | N+P+K fertilizer |    | NPK + Biochar |   | NPK + Straw   |    |
|------------------------------------|---------------|----|---------------|---|------------------|----|---------------|---|---------------|----|
| pH                                 | 6.00 (0.01)   | a  | 5.66 (0.01)   | c | 5.10 (0.01)      | e  | 5.45 (0.01)   | d | 5.89 (0.04)   | b  |
| TOC (g kg <sup>-1</sup> )          | 9.87 (0.01)   | c  | 9.27 (0.02)   | e | 9.59 (0.04)      | d  | 10.85 (0.04)  | a | 10.03 (0.07)  | b  |
| TN (g kg <sup>-1</sup> )           | 0.90 (0.01)   | b  | 0.77 (0.01)   | d | 0.98 (0.04)      | a  | 0.87 (0.03)   | b | 0.87 (0.02)   | c  |
| TP (g kg <sup>-1</sup> )           | 0.51 (0.01)   | c  | 0.50 (0.01)   | c | 0.56 (0.01)      | b  | 0.58 (0.01)   | a | 0.54 (0.01)   | b  |
| Olsen-P (mg kg <sup>-1</sup> )     | 16.30 (0.33)  | c  | 11.28 (0.55)  | d | 16.86 (0.58)     | c  | 21.88 (0.35)  | b | 23.95 (0.84)  | a  |
| Available N (mg kg <sup>-1</sup> ) | 112.00 (0.85) | a  | 87.16 (0.99)  | e | 94.52 (1.21)     | d  | 97.10 (0.99)  | b | 97.00 (1.22)  | c  |
| Available K (mg kg <sup>-1</sup> ) | 110.00 (0.89) | e  | 137.56 (1.47) | c | 146.82 (1.34)    | b  | 154.46 (1.06) | a | 129.50 (0.90) | d  |
| NaOH + EDTA-P <sub>rec</sub> (%)   | 31.00 (1.32)  | bc | 28.99 (1.33)  | c | 32.75 (2.57)     | ab | 37.42 (3.11)  | a | 33.02 (2.15)  | ab |

644 Values are means. Values in parentheses are standard deviations (n=3). Different letters in a column indicate  
 645 significant differences at the 0.05 level. Same below. TOC: total organic carbon; TN: total nitrogen; TP: total  
 646 phosphorus; NaOH + EDTA-P<sub>rec</sub>: the phosphorus extraction efficiency of NaOH + EDTA.

647



648 Table 2 Variation of soil P compounds contents in the Hedley improvement method (1993) to  
 649 total phosphorus in five treatments.

| Treatment | Concentration of soil P fraction (mg kg <sup>-1</sup> ) |                        |                        |              |              |              |                |
|-----------|---------------------------------------------------------|------------------------|------------------------|--------------|--------------|--------------|----------------|
|           | Resin-P                                                 | NaHCO <sub>3</sub> -Pi | NaHCO <sub>3</sub> -Po | NaOH-Pi      | NaOH-Po      | HCl-P        | Residual-P     |
| CK0       | 6.92 (1.02)                                             | 25.01 (0.77)           | 10.94 (2.16)           | 57.17 (5.42) | 25.01 (1.67) | 23.45 (2.18) | 360.37 (8.10)  |
| CK        | 6.25 (0.77)                                             | 23.89 (2.97)           | 9.16 (0.71)            | 43.99 (5.75) | 31.04 (2.58) | 19.21 (2.06) | 364.88 (7.90)  |
| NPK       | 9.60 (1.41)                                             | 42.65 (3.45)           | 11.17 (1.93)           | 69.67 (8.12) | 36.18 (3.73) | 23.67 (2.98) | 362.58 (15.36) |
| CNPK      | 16.08 (2.74)                                            | 41.54 (2.88)           | 13.62 (2.22)           | 61.19 (3.72) | 58.06 (5.84) | 18.31 (3.01) | 365.96 (17.75) |
| SNPK      | 8.61 (1.32)                                             | 40.72 (3.24)           | 10.53 (1.91)           | 65.79 (3.63) | 37.36 (3.94) | 20.63 (1.29) | 355.23 (6.47)  |

650 CK0: the initial soil in 2013; CK: the unfertilized control; NPK: N+P+K mineral fertilizer; CNPK: biochar in  
 651 combination with NPK mineral fertilizer; and SNPK: corn straw in combination with NPK mineral fertilizer.  
 652 Resin-P: resin exchanged phosphorus; NaHCO<sub>3</sub>-P (Pi and Po): NaHCO<sub>3</sub> extracted state inorganic phosphorus and  
 653 organic phosphorus; NaOH-P (Pi and Po): NaOH extracted state inorganic phosphorus and organic phosphorus;  
 654 HCl-P: 1 mol L dilute hydrochloric acid to extract phosphorus; and Residual-P: residual phosphorus. Same below.





655 Table 3 Concentrations and proportions of P compound classes by solution 31-phosphorus  
 656 nuclear magnetic resonance spectra.

| P composition  | P content (mg kg <sup>-1</sup> ) |   |             |   |              |    |              |    |             |    |
|----------------|----------------------------------|---|-------------|---|--------------|----|--------------|----|-------------|----|
|                | CK0                              |   | CK          |   | NPK          |    | CNPk         |    | SNPK        |    |
| Total Pi       | 94.2 (7.9)                       | d | 114.3 (7.0) | c | 143.8 (11.3) | b  | 173.2 (10.7) | a  | 107.4 (2.5) | cd |
| Total Po       | 63.6 (6.7)                       | a | 30.6 (3.1)  | c | 39.6 (3.1)   | b  | 43.8 (2.9)   | b  | 71.1 (1.7)  | a  |
| Orthophosphate | 91.6 (5.5)                       | c | 106.2 (5.0) | c | 136.8 (8.8)  | b  | 166.2 (10.4) | a  | 98.1 (8.1)  | c  |
| Pyrophosphate  | 2.6 (0.3)                        | b | 3.0 (0.3)   | b | 2.2 (0.1)    | b  | 1.7 (0.1)    | b  | 4.9 (1.4)   | a  |
| Mono           | 60.3 (6.4)                       | a | 25.9 (3.0)  | c | 37.3 (2.9)   | b  | 37.1 (2.3)   | b  | 62.0 (7.7)  | a  |
| Diester        | 3.3 (0.4)                        | b | 1.2 (0.1)   | c | 2.0 (0.2)    | c  | 4.8 (0.3)    | a  | 3.9 (1.1)   | ab |
| Mo/Di          | 18.3 (1.5)                       |   | 21.6 (1.8)  |   | 18.7 (2.2)   |    | 7.8 (0.8)    |    | 15.9 (0.6)  |    |
| Total IHP      | 37.6 (4.0)                       | a | 21.2 (2.0)  | c | 28.2 (2.2)   | b  | 31.0 (1.9)   | b  | 41.2 (1.9)  | a  |
| AMP            | 0.0                              | c | 2.8 (0.3)   | b | 7.5 (0.5)    | a  | 7.0 (2.2)    | a  | 6.3 (1.8)   | a  |
| DNA            | 3.1 (0.3)                        | a | 0.0         | d | 0.9 (0.1)    | c  | 2.4 (0.1)    | b  | 2.1 (0.6)   | b  |
| c Mono         | 41.2 (4.4)                       | a | 21.5 (2.5)  | c | 30.1 (2.4)   | b  | 28.0 (1.7)   | b  | 47.9 (3.7)  | a  |
| c Diester      | 22.4 (2.4)                       | a | 5.7 (0.6)   | d | 9.4 (0.7)    | cd | 13.9 (0.9)   | bc | 18.0 (5.1)  | ab |
| c Mo/Di        | 1.8 (0.1)                        |   | 3.8 (0.3)   |   | 3.2 (0.3)    |    | 2.0 (0.2)    |    | 2.7 (0.2)   |    |

657 Total IHP: total inositol hexakisphosphate (sum: myo-Inositol hexakisphosphate; scyllo- Inositol  
 658 hexakisphosphate; neo- Inositol hexakisphosphate; and D-chiro- Inositol hexakisphosphate.); Total Pi: total  
 659 inorganic phosphorus; Total Po: total organic phosphorus; Mono: orthophosphate monoesters; Mo/Di:  
 660 Monoester/Diester ratio; and c: denotes the correction for degradation products. Same below



661 Table 4 Correlation coefficients among P fractions in the Hedley improvement method (1993)  
662 and soil P compounds (n=15).

| P fraction             | Orthophosphate | Pyrophosphate | Total IHP | AMP     | DNA    | c Monoester | c Diester |
|------------------------|----------------|---------------|-----------|---------|--------|-------------|-----------|
| Resin-P                | 0.907**        | -0.484*       | 0.045     | 0.241   | 0.314  | -0.181      | 0.006     |
| NaHCO <sub>3</sub> -Pi | 0.630**        | 0.002         | 0.272     | 0.935** | 0.121  | 0.192       | -0.019    |
| NaHCO <sub>3</sub> -Po | 0.799**        | -0.549*       | 0.236     | 0.457*  | 0.568* | -0.003      | 0.277     |
| NaOH-Pi                | 0.317          | 0.053         | 0.552*    | 0.651** | 0.381  | 0.510*      | 0.332     |
| NaOH-Po                | 0.883**        | -0.342        | -0.043    | 0.713** | 0.144  | -0.244      | -0.144    |
| HCl-P                  | -0.382         | -0.024        | 0.290     | -0.237  | 0.191  | 0.393       | 0.340     |
| Residual-P             | 0.847**        | -0.789**      | -0.485*   | 0.252   | -0.015 | -0.691**    | -0.332    |

663 c: denotes the correction for degradation products. r - value was shown. Indicating significance (*Person coefficient*  
664 are as follows: \* $P < 0.05$ ; \*\* $P < 0.01$ ).



665 **Figure 1**

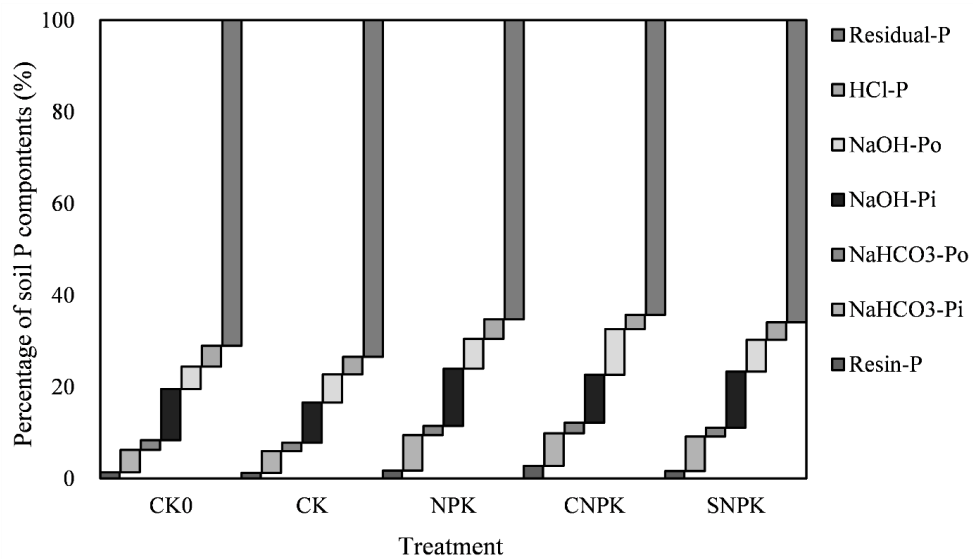

666



667 **Figure 2**

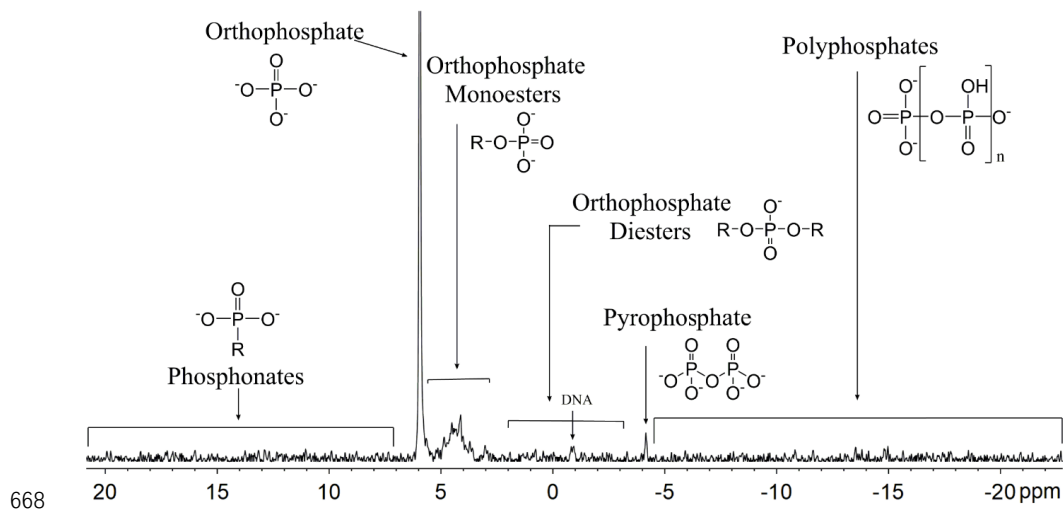



669 **Figure 3**

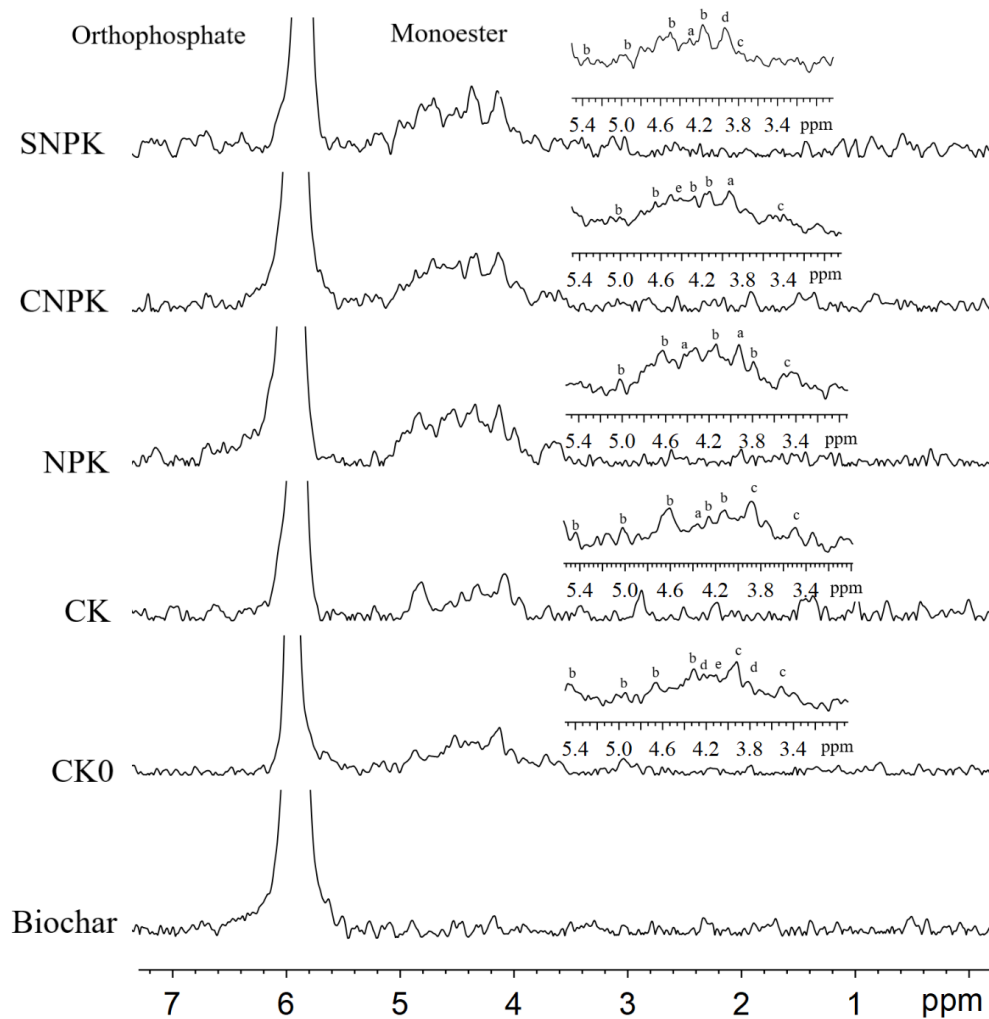

670
